# Supplementary material for: NOD2 gene variants confer risk for secondary sclerosing cholangitis in critically ill patients
Source: PubMed Central journal article supplement (PMC5539147; doi:10.1038/s41598-017-06268-y), 2017-08-01
Supplement: 41598_2017_6268_MOESM1_ESM.pdf [file 41598_2017_6268_MOESM1_ESM.pdf]

## **Supplementary material**

### ***NOD2* gene variants confer risk for secondary sclerosing cholangitis in critically ill patients**

Christoph Jüngst<sup>1\*</sup>, Vanessa Stadlbauer<sup>2\*</sup>, Matthias C Reichert<sup>1</sup>, Vincent Zimmer<sup>1</sup>, Susanne N Weber<sup>1</sup>, Lisa Ofner-Ziegenfuß<sup>3</sup>, Torsten Voigtländer<sup>4</sup>, Walter Spindelböck<sup>2</sup>, Peter Fickert<sup>2</sup>, Gabriele I Kirchner<sup>5</sup>, Frank Lammert<sup>1#</sup>, Tim O Lankisch<sup>4#</sup> and Marcin Krawczyk<sup>1#</sup>

**Supplementary table 1:** Clinical, endoscopic and laboratory characteristics of the replication cohort (Cohort 2) comprising 29 patients with SC-CIP

| <b>Parameter</b>                           | <b>Number</b> |
|--------------------------------------------|---------------|
| Age (years)                                | 54 (16 - 74)  |
| Gender                                     | 7 F/22 M      |
| <b>ICU features</b>                        |               |
| ICU days                                   | 43 (14 - 229) |
| Ventilation days                           | 30 (9 - 165)  |
| Vasopressors (%)                           | 25 (86.2%)    |
| Renal replacement therapy (%)              | 10 (34.5%)    |
| <b>Endoscopic features<sup>#</sup></b>     |               |
| Time from ICU admission to ERCP/MRCP, days | 85 (8 - 1403) |
| Intrahepatic strictures and rarefactions   | 23/27 (85.2%) |
| Extrahepatic strictures                    | 6/27 (22.2%)  |
| Biliary casts                              | 22/25 (88.0%) |
| Nasobiliary drainage                       | 0             |
| <b>Clinical features</b>                   |               |
| Sepsis                                     | 22 (75.9%)    |
| Cholangitis                                | 16 (55.2%)    |

|                                |           |
|--------------------------------|-----------|
| Progression to liver cirrhosis | 9 (31.0%) |
| Liver transplantation          | 7 (24.1%) |
| Death                          | 9 (31.0%) |

---

**Laboratory values\***

|                            |                     |
|----------------------------|---------------------|
| ALT (U/l)                  | 117 (40 - 361)      |
| Alkaline phosphatase (U/l) | 884 (140 - 3366)    |
| γ-GT (U/l)                 | 939 (113 - 2999)    |
| Bilirubin (mg/dl)          | 4.69 (0.50 - 35.51) |
| Creatinine (mg/dl)         | 1.0 (0.41 - 3.33)   |
| INR                        | 1.15 (0.90 - 2.38)  |
| CRP (mg/l)                 | 36 (0.6 - 195)      |
| MELD score (UNOS modified) | 15 (6 - 36)         |

---

|                  |                |
|------------------|----------------|
| Follow-up (days) | 748 (5 - 3966) |
|------------------|----------------|

---

Values are given as medians and ranges.

Abbreviations: ALT, alanine aminotransferase; CRP, C-reactive protein; ERCP, endoscopic retrograde cholangiopancreatography; F, female; γ-GT, gamma-glutamyl-transferase; ICU, intensive care unit; INR, international normalized ratio; M, male; MELD, model of end-stage liver disease; MRCP, magnetic resonance cholangiopancreatography, SC-CIP, sclerosing cholangitis in critically ill patients.

#In 25 of the patients with SC-CIP, cholangiography was obtained by endoscopic retrograde cholangiography procedure, and in 2 patients magnet resonance cholangiography was

performed only. In 2 patients SC-CIP was diagnosed by typical clinical and histological features plus ultrasound, respectively.

\*Values from the day of the first ERCP or MRCP.

**Supplementary table 2:** Genotype distribution of selected variants in the hepatobiliary transporter genes *ABCB4*, *ABCB11* and *ATP8B1* of the SC-CIP patients of Cohort 1 and 2

| <b>Polymorphism</b>                   | <b>Cohort 1 n = 17 (%)</b> | <b>Cohort 2 n = 28 (%)</b> |
|---------------------------------------|----------------------------|----------------------------|
| <b>ABCB4</b>                          |                            |                            |
| <u><i>c.504T&gt;C (rs1202283)</i></u> |                            |                            |
| CC                                    | 2 (11.8)                   | 3 (10.7)                   |
| TC                                    | 9 (52.9)                   | 9 (32.1)                   |
| TT                                    | 6 (35.3)                   | 16 (57.1)                  |
| <u><i>c.711A&gt;T (rs2109505)</i></u> |                            |                            |
| TT                                    | 1 (5.9)                    | 0                          |
| AT                                    | 6 (35.3)                   | 5 (17.9)                   |
| AA                                    | 10 (58.8)                  | 23 (82.1)                  |
| <b>ABCB11</b>                         |                            |                            |
| <u><i>p.A444V (rs2287622)</i></u>     |                            |                            |
| TT                                    | 4 (23.5)                   | 3 (10.7)                   |
| CT                                    | 6 (35.3)                   | 15 (53.6)                  |
| CC                                    | 7 (41.2)                   | 10 (35.7)                  |
| <u><i>c.3084A&gt;G (rs497692)</i></u> |                            |                            |
| AA                                    | 2 (11.8)                   | 5 (17.9)                   |
| AG                                    | 10 (58.8)                  | 20 (71.4)                  |
| GG                                    | 5 (29.4)                   | 3 (10.7)                   |

## ATP8B1

### p.R952Q (rs12968116)

|    |           |           |
|----|-----------|-----------|
| GG | 12 (70.6) | 22 (78.5) |
| GA | 5 (29.4)  | 5 (17.9)  |
| AA | 0         | 1 (3.6)   |

---

None of the patients of Cohort 1 and Cohort 2 carried the following variants in the hepatocanalicular transporter genes: *ABCB4* (rs45575636 [p.R590Q]), *ABCB11* (rs11568372 [p.E297G], rs72549402 [p.D482G]), and *ATP8B1* (rs146599962 [p.N45T], rs34018205 [p.E429A], rs121909100 [p.I661T]). One patient of Cohort 1 was positive for the variant (rs56163822 [c.-1g>t]) in the farnesoid X receptor *NR1H4*. For Cohort 2, blood samples from 28 of the 29 patients were available for genetic analysis of the hepatocanalicular transporter genes.
